# Supplementary material for: SO2 capture by ionic liquid and spectroscopic speciation of sulfur(iv) therein
Source: Royal Society of Chemistry journal article supplement (doi:10.1039/c6ra25528k), 2017-01-01

## Supporting information for

# SO<sub>2</sub> capture by ionic liquid and spectroscopic speciation of sulfur (IV) therein

Yoshiro Yasaka,\* Koki Watanabe, and Yoshifumi Kimura\*

*Department of Molecular Chemistry and Biochemistry, Faculty of Science and Engineering, Doshisha University,  
Kyotanabe, Kyoto 610-0321, Japan*

Corresponding Authors

Yoshifumi Kimura and Yoshiro Yasaka

Department of Molecular Chemistry and Biochemistry

Faculty of Science and Engineering

Doshisha University

Kyoto 610-0321, Japan

Table S1. Thermal energies for the optimized structures of monomers and clusters using aug-cc-pVTZ basis set and B3PW91 functional

|                                                            | $E$ in vapor (hartree) | $E$ in SCRF water (hartree) |
|------------------------------------------------------------|------------------------|-----------------------------|
| SO <sub>2</sub>                                            | -548.587924            | -548.593472                 |
| CO <sub>2</sub>                                            | -188.570869            | -188.573349                 |
| H <sub>2</sub> O                                           | -76.411785             | -76.418394                  |
| HCO <sub>3</sub> <sup>-</sup>                              | -264.434037            | -264.536980                 |
| HSO <sub>3</sub> <sup>-</sup>                              | -624.472227            | -624.568445                 |
| HOSO <sub>2</sub> <sup>-</sup>                             | -624.476141            | -624.572371                 |
| S <sub>2</sub> O <sub>5</sub> <sup>2-</sup>                | -1172.417332           | -                           |
| (HOSO <sub>2</sub> ) <sub>2</sub> <sup>2-</sup> symmetric  | -                      | -1249.154095                |
| (HOSO <sub>2</sub> ) <sub>2</sub> <sup>2-</sup> asymmetric | -                      | -1249.154649                |
| (HOSO <sub>2</sub> <sup>-</sup> )SO <sub>2</sub>           | -1173.089803           | -1173.171224                |
| (HSO <sub>3</sub> <sup>-</sup> )SO <sub>2</sub>            | -1173.083120           | -1173.165021                |

Table S2. Thermal energies for the optimized structures of monomers and clusters using 6-311G+(d,p) basis set and B3PW91 functional. (T) and (G) mean the all trans and all gauche conformations of alkyl-chains of the phosphonium cation.

|                                           | $E$ (hartree) |
|-------------------------------------------|---------------|
| SO <sub>2</sub>                           | -548.540968   |
| CO <sub>2</sub>                           | -188.554120   |
| H <sub>2</sub> O                          | -76.403810    |
| HCO <sub>3</sub> <sup>-</sup>             | -264.411579   |
| HSO <sub>3</sub> <sup>-</sup>             | -624.407775   |
| HOSO <sub>2</sub> <sup>-</sup>            | -624.419833   |
| [P <sub>4448</sub> ] <sup>+</sup> (T)     | -1129.100874  |
| [P <sub>4448</sub> ]HCO <sub>3</sub> (T)  | -1393.647760  |
| [P <sub>4448</sub> ]HSO <sub>3</sub> (T)  | -1753.636099  |
| [P <sub>4448</sub> ]HOSO <sub>2</sub> (T) | -1753.651688  |
| [P <sub>4448</sub> ] <sup>+</sup> (G)     | -1129.091735  |
| [P <sub>4448</sub> ]HCO <sub>3</sub> (G)  | -1393.636698  |
| [P <sub>4448</sub> ]HSO <sub>3</sub> (G)  | -1753.623588  |
| [P <sub>4448</sub> ]HOSO <sub>2</sub> (G) | -1753.641198  |

Table S3. Calculated geometries of (a) $\text{HCO}_3^-$ , (b) $\text{HSO}_3^-$ , and (c) $\text{HOSO}_2^-$  by DFT calculations using B3PW91 functional. Figures S1 and S2 show the geometrical parameter definitions. Distances in angstroms with a two atom sequence denoting a bond. Angles in degrees with a three atom sequence denoting a bond angle and a four-atom sequence denoting a dihedral angle. In cases of cluster with a cation, the distance to the phosphonium atom is also denoted.

(a) $\text{HCO}_3^-$

|                          | aug-cc-pVTZ |               | 6-311G+(d,p) |                                |                                |
|--------------------------|-------------|---------------|--------------|--------------------------------|--------------------------------|
|                          | in vacuum   | in SCRF water | in vacuum    | with $[\text{P}_{4448}]^+$ (T) | with $[\text{P}_{4448}]^+$ (G) |
| $\text{HO}_1$            | 0.9621      | 0.9635        | 0.9623       | 0.9634                         | 0.9634                         |
| $\text{CO}_1$            | 1.4389      | 1.4035        | 1.4434       | 1.3841                         | 1.3846                         |
| $\text{CO}_2$            | 1.2488      | 1.2485        | 1.2492       | 1.2534                         | 1.2524                         |
| $\text{CO}_3$            | 1.2329      | 1.2420        | 1.2324       | 1.2479                         | 1.2484                         |
| $\text{HO}_1\text{C}$    | 101.82      | 105.47        | 102.09       | 104.60                         | 104.62                         |
| $\text{O}_1\text{CO}_2$  | 113.51      | 115.62        | 113.33       | 116.36                         | 116.43                         |
| $\text{O}_1\text{CO}_3$  | 114.19      | 114.29        | 114.08       | 115.22                         | 115.12                         |
| $\text{O}_2\text{CO}_3$  | 132.31      | 130.09        | 132.59       | 128.42                         | 128.45                         |
| $\text{HO}_1\text{CO}_2$ | -0.01       | -0.02         | 0.00         | -0.27                          | -0.29                          |
| $\text{HO}_1\text{CO}_3$ | 180.00      | 179.99        | 180.00       | 179.8                          | 179.61                         |
| CP                       |             |               |              | 3.8785                         | 3.8767                         |

(b) $\text{HSO}_3^-$

|                         | aug-cc-pVTZ |               | 6-311G+(d,p) |                                |                                |
|-------------------------|-------------|---------------|--------------|--------------------------------|--------------------------------|
|                         | in vacuum   | in SCRF water | in vacuum    | with $[\text{P}_{4448}]^+$ (T) | with $[\text{P}_{4448}]^+$ (G) |
| HS                      | 1.3747      | 1.3625        | 1.3815       | 1.3680                         | 1.3682                         |
| $\text{SO}_1$           | 1.4722      | 1.4738        | 1.4794       | 1.4845                         | 1.4794                         |
| $\text{SO}_2$           |             |               |              | 1.4830                         | 1.4925                         |
| $\text{SO}_3$           |             |               |              | 1.4783                         | 1.4738                         |
| $\text{HSO}_1$          | 103.81      | 104.78        | 103.76       | 105.21                         | 105.28                         |
| $\text{HSO}_2$          |             |               |              | 105.04                         | 104.43                         |
| $\text{HSO}_3$          |             |               |              | 105.51                         | 105.66                         |
| $\text{O}_1\text{SO}_2$ | 114.49      | 113.73        | 114.53       | 112.79                         | 112.31                         |
| $\text{O}_1\text{SO}_3$ |             |               |              | 113.56                         | 114.74                         |
| $\text{O}_2\text{SO}_3$ |             |               |              | 113.67                         | 113.26                         |
| SP                      |             |               |              | 4.0129                         | 4.1527                         |

(c)HOSO<sub>2</sub><sup>-</sup>

|                                 | aug-cc-pVTZ |               | 6-311G+(d,p) |                                            |                                            |
|---------------------------------|-------------|---------------|--------------|--------------------------------------------|--------------------------------------------|
|                                 | in vacuum   | in SCRF water | in vacuum    | with [P <sub>4448</sub> ] <sup>+</sup> (T) | with [P <sub>4448</sub> ] <sup>+</sup> (G) |
| HO <sub>1</sub>                 | 0.9662      | 0.9679        | 0.9672       | 0.9648                                     | 0.9647                                     |
| SO <sub>1</sub>                 | 1.7597      | 1.7249        | 1.7920       | 1.7935                                     | 1.7938                                     |
| SO <sub>2</sub>                 | 1.5020      | 1.5028        | 1.5069       | 1.5068                                     | 1.5060                                     |
| SO <sub>3</sub>                 | 1.4888      | 1.4962        | 1.4969       | 1.4988                                     | 1.4994                                     |
| HO <sub>1</sub> S               | 100.44      | 104.48        | 101.78       | 106.56                                     | 106.44                                     |
| O <sub>1</sub> SO <sub>2</sub>  | 99.11       | 100.48        | 99.72        | 101.13                                     | 101.15                                     |
| O <sub>1</sub> SO <sub>3</sub>  | 103.15      | 102.79        | 103.52       | 97.28                                      | 97.26                                      |
| O <sub>2</sub> SO <sub>3</sub>  | 112.12      | 110.77        | 112.14       | 111.26                                     | 111.26                                     |
| HO <sub>1</sub> SO <sub>2</sub> | 12.88       | 15.14         | 29.05        | 63.46                                      | 62.61                                      |
| HO <sub>1</sub> SO <sub>3</sub> | -102.53     | -99.18        | -86.7        | 176.89                                     | 176.05                                     |
| SP                              |             |               |              | 4.1544                                     | 4.1587                                     |

Table S4. Raman bands observed experimentally. Only the bands assigned to anionic species are listed for those of  $[P_{4448}]HCO_3$  and  $[P_{4448}]HSO_3$ . The Raman shifts of  $[P_{4448}]Br$  are the apparent peak positions, and those of  $[P_{4448}]HCO_3$  and  $[P_{4448}]HSO_3$  are those obtained by multi-peak fittings after the subtraction of cation bands. The region of CH stretching vibrations is omitted.

| $[P_{4448}]Br$ | $[P_{4448}]HCO_3$ | $[P_{4448}]HSO_3$<br>$q_{SO_2} = 0.98$ | $[P_{4448}]HSO_3$<br>$q_{SO_2} = 1.57$ |
|----------------|-------------------|----------------------------------------|----------------------------------------|
| 249 s          |                   | 315 s                                  | 314 s                                  |
|                |                   |                                        | 430~470 s                              |
|                |                   | 505 s                                  | 503 s                                  |
|                | 621 m             |                                        | 635 m                                  |
| 642 shoulder   |                   |                                        |                                        |
| 694 shoulder   |                   |                                        |                                        |
| 716 vw         |                   |                                        |                                        |
|                |                   | 725 m                                  | 723 m                                  |
| 752 w          |                   |                                        |                                        |
| 810 vw         |                   |                                        |                                        |
| 844 vw         |                   |                                        |                                        |
| 870 s          |                   |                                        |                                        |
| 893 s          |                   |                                        |                                        |
| 970 w          |                   |                                        |                                        |
|                | 996 s             |                                        |                                        |
| 1012 w         |                   |                                        |                                        |
| 1033 w         |                   |                                        |                                        |
|                |                   | 1029 w                                 | 1029 w                                 |
|                |                   | 1048 s                                 | 1046 s                                 |
| 1053 s         |                   |                                        |                                        |
|                |                   | 1079 m                                 | 1078 s                                 |
| 1087 shoulder  |                   |                                        |                                        |
| 1101 s         |                   |                                        |                                        |
| 1116 shoulder  |                   |                                        |                                        |
|                |                   | 1120 m                                 | 1119 m                                 |
|                |                   |                                        | 1144 s                                 |
| 1170 w         |                   |                                        |                                        |
| 1201 w         |                   |                                        |                                        |
| 1236 w         |                   |                                        |                                        |
|                | 1262 s            |                                        |                                        |
| 1278 s         |                   |                                        |                                        |
| 1304 s         |                   |                                        |                                        |
| 1311 s         |                   |                                        |                                        |
| 1348 w         |                   |                                        |                                        |
| 1411 w         |                   |                                        |                                        |
| 1449 s         |                   |                                        |                                        |
|                | 1655 m            |                                        |                                        |
|                | 1672 m            |                                        |                                        |
|                |                   | 2444 m                                 | 2447 m                                 |

Table S5. Vibrational frequencies for  $\text{HCO}_3^-$ ,  $\text{HSO}_3^-$ , and  $\text{HOSO}_2^-$  for the optimized structure by the DFT calculations using B3PW91 functional with different basis-sets and solvent model.

$\text{HCO}_3^-$

| Assgnt <sup>a</sup>                | aug-cc-pVTZ<br>in vacuum | aug-cc-pVTZ<br>in SCRF water | 6-311G+(d,p)<br>in vacuum |
|------------------------------------|--------------------------|------------------------------|---------------------------|
| $\delta\text{OC(OH)}$              | 548                      | 563                          | 551                       |
| $\rho\text{OH}$                    | 551                      | 526                          | 527                       |
| $\nu\text{CO} + \delta\text{CO}_2$ | 630                      | 654                          | 630                       |
| $\delta_s \text{CO}_3$ (umbrella)  | 827                      | 826                          | 823                       |
| $\nu\text{CO} + \delta\text{CO}_2$ | 863                      | 914                          | 861                       |
| $\delta\text{COH}$                 | 1194                     | 1197                         | 1197                      |
| $\nu_s\text{CO}_2$                 | 1309                     | 1316                         | 1312                      |
| $\nu_{\text{as}}\text{CO}_2$       | 1773                     | 1692                         | 1791                      |
| $\nu\text{OH}$                     | 3822                     | 3811                         | 3842                      |

$\text{HSO}_3^-$

| Assgnt <sup>a</sup>                  | aug-cc-pVTZ<br>in vacuum | aug-cc-pVTZ<br>in SCRF water | 6-311G+(d,p)<br>in vacuum |
|--------------------------------------|--------------------------|------------------------------|---------------------------|
| $\delta\text{SO}_2$ E                | 484                      | 481                          | 478                       |
| $\delta_s\text{SO}_3$ A <sub>1</sub> | 614                      | 600                          | 609                       |
| $\nu_s\text{SO}_3$ A <sub>1</sub>    | 1031                     | 1029                         | 1011                      |
| $\delta\text{OSH}$ E                 | 1099                     | 1105                         | 1096                      |
| $\nu_a\text{SO}_3$ E                 | 1225                     | 1189                         | 1205                      |
| $\nu\text{SH}$ A <sub>1</sub>        | 2389                     | 2501                         | 2377                      |

$\text{HOSO}_2^-$

| Assgnt <sup>a</sup>                             | aug-cc-pVTZ<br>in vacuum | aug-cc-pVTZ<br>in SCRF water | 6-311G+(d,p)<br>in vacuum |
|-------------------------------------------------|--------------------------|------------------------------|---------------------------|
| $\rho\text{OH}$                                 | 215                      | 122                          | 149                       |
| $\delta\text{OS(OH)}$                           | 356                      | 362                          | 361                       |
| $\omega\text{SO}_2 + \nu\text{S(OH)}$           | 393                      | 413                          | 376                       |
| $\delta\text{SO}_2 + \nu\text{S(OH)}$           | 525                      | 528                          | 505                       |
| $\delta_s\text{SO}_2(\text{OH})$                | 591                      | 591                          | 558                       |
| $\delta\text{SOH} + \nu\text{SO}$               | 1005                     | 1000                         | 986                       |
| $\delta\text{SOH} + \nu_s\text{SO}_2$           | 1096                     | 1070                         | 1076                      |
| $\delta\text{SOH} + \nu_{\text{as}}\text{SO}_2$ | 1155                     | 1106                         | 1125                      |
| $\nu\text{OH}$                                  | 3769                     | 3752                         | 3779                      |

<sup>a</sup> Notation of vibrational modes :  $\nu$ , stretching;  $\delta$ , bending;  $\tau$ , twisting;  $\omega$ , wagging;  $\rho$ , rocking; s, symmetric; a, asymmetric.

Table S6. Calculated geometries of HOSO<sub>2</sub><sup>-</sup> dimer (symmetric and asymmetric) by DFT calculations using B3PW91 functional and aug-cc-pVTZ in SCRF model water. Figures S6(a) and(b) show the geometrical parameter definitions. Distances in angstroms with a two atom sequence denoting a bond. Angles in degrees with a three atom sequence denoting a bond angle and a four-atom sequence denoting a dihedral angle.

|                                                             | Symmetric dimer | Asymmetric dimer |
|-------------------------------------------------------------|-----------------|------------------|
| H <sub>1</sub> O <sub>1</sub>                               | 1.0026          | 0.9986           |
| H <sub>2</sub> O <sub>5</sub>                               | 1.0026          | 0.9984           |
| O <sub>2</sub> H <sub>2</sub>                               | 1.6781          | 1.6760           |
| O <sub>5</sub> H <sub>1</sub>                               | 1.6783          | 1.7017           |
| S <sub>1</sub> O <sub>1</sub>                               | 1.6649          | 1.6663           |
| S <sub>1</sub> O <sub>2</sub>                               | 1.5224          | 1.5217           |
| S <sub>1</sub> O <sub>3</sub>                               | 1.5023          | 1.5015           |
| S <sub>2</sub> O <sub>4</sub>                               | 1.6649          | 1.6773           |
| S <sub>2</sub> O <sub>5</sub>                               | 1.5224          | 1.5194           |
| S <sub>2</sub> O <sub>6</sub>                               | 1.5023          | 1.4960           |
| H <sub>1</sub> O <sub>1</sub> S <sub>1</sub>                | 109.49          | 109.95           |
| H <sub>2</sub> O <sub>4</sub> S <sub>2</sub>                | 109.49          | 107.48           |
| O <sub>1</sub> S <sub>1</sub> O <sub>2</sub>                | 102.67          | 102.86           |
| O <sub>1</sub> S <sub>1</sub> O <sub>3</sub>                | 104.46          | 104.37           |
| O <sub>2</sub> S <sub>1</sub> O <sub>3</sub>                | 109.07          | 109.05           |
| O <sub>4</sub> S <sub>2</sub> O <sub>5</sub>                | 102.67          | 102.25           |
| O <sub>4</sub> S <sub>2</sub> O <sub>6</sub>                | 104.46          | 100.31           |
| O <sub>5</sub> S <sub>2</sub> O <sub>6</sub>                | 109.07          | 109.83           |
| O <sub>2</sub> H <sub>2</sub> O <sub>4</sub>                | 176.07          | 176.59           |
| O <sub>5</sub> H <sub>1</sub> O <sub>1</sub>                | 176.13          | 173.06           |
| S <sub>1</sub> O <sub>2</sub> H <sub>2</sub>                | 121.53          | 126.14           |
| S <sub>2</sub> O <sub>5</sub> H <sub>1</sub>                | 121.57          | 120.49           |
| H <sub>1</sub> O <sub>1</sub> S <sub>1</sub> O <sub>2</sub> | -45.55          | -46.94           |
| H <sub>1</sub> O <sub>1</sub> S <sub>1</sub> O <sub>3</sub> | 68.26           | 66.89            |
| H <sub>2</sub> O <sub>4</sub> S <sub>2</sub> O <sub>5</sub> | 45.47           | -57.71           |
| H <sub>2</sub> O <sub>4</sub> S <sub>2</sub> O <sub>6</sub> | -68.35          | -170.81          |
| O <sub>1</sub> S <sub>1</sub> O <sub>2</sub> H <sub>2</sub> | 52.57           | 29.75            |
| O <sub>3</sub> S <sub>1</sub> O <sub>2</sub> H <sub>2</sub> | -57.83          | -80.62           |
| O <sub>4</sub> S <sub>2</sub> O <sub>5</sub> H <sub>1</sub> | -52.53          | 43.09            |
| O <sub>6</sub> S <sub>2</sub> O <sub>5</sub> H <sub>1</sub> | 57.87           | 148.94           |
| S <sub>2</sub> O <sub>5</sub> O <sub>1</sub> S <sub>1</sub> | 57.52           | 19.05            |
| S <sub>2</sub> O <sub>4</sub> O <sub>2</sub> S <sub>1</sub> | -57.51          | 31.68            |

Table S7. Calculated geometries of complex of  $\text{HOSO}_2^-$  and  $\text{SO}_2$ ,  $\text{S}_2\text{O}_5^{2-}$ , and  $\text{SO}_2$  by DFT calculations using B3PW91 functional and aug-cc-pVTZ. Figures S7(a-d) show the geometrical parameter definitions. Distances in angstroms with a two atom sequence denoting a bond. Angles in degrees with a three atom sequence denoting a bond angle and a four-atom sequence denoting a dihedral angle.

|                                            | $\text{HS}_2\text{O}_5^-$       |                                 | $\text{S}_2\text{O}_5^{2-}$ | $\text{SO}_2$ |
|--------------------------------------------|---------------------------------|---------------------------------|-----------------------------|---------------|
|                                            | $\text{HOSO}_2^- + \text{SO}_2$ | $\text{HOSO}_2^- + \text{SO}_2$ |                             |               |
| $\text{HO}_1$                              | 0.9826                          |                                 |                             |               |
| $\text{HS}_1$                              |                                 | 1.3641                          |                             |               |
| $\text{O}_5\text{H}$                       | 1.8560                          | 3.0727                          |                             |               |
| $\text{S}_1\text{S}_2$                     | 2.5220                          | 3.2522                          | 2.4050                      |               |
| $\text{S}_1\text{O}_1$                     | 1.6535                          | 1.4607                          | 1.4929                      |               |
| $\text{S}_1\text{O}_2$                     | 1.4712                          | 1.4603                          | 1.4964                      |               |
| $\text{S}_1\text{O}_3$                     | 1.4677                          | 1.5074                          | 1.4964                      |               |
| $\text{S}_2\text{O}_4$                     | 1.4735                          | 1.4604                          | 1.5070                      | 1.4474        |
| $\text{S}_2\text{O}_5$                     | 1.4948                          | 1.4635                          | 1.5069                      | 1.4474        |
| $\text{HO}_1\text{S}_1$                    | 103.31                          |                                 |                             |               |
| $\text{HS}_1\text{O}_1$                    | 26.96                           | 105.35                          |                             |               |
| $\text{HS}_1\text{O}_2$                    |                                 | 105.78                          |                             |               |
| $\text{HS}_1\text{O}_3$                    |                                 | 102.69                          |                             |               |
| $\text{O}_1\text{S}_1\text{O}_2$           | 106.99                          | 116.83                          | 112.42                      |               |
| $\text{O}_1\text{S}_1\text{O}_3$           | 105.03                          | 113.12                          | 112.42                      |               |
| $\text{O}_2\text{S}_1\text{O}_3$           | 115.98                          | 111.54                          | 111.63                      |               |
| $\text{O}_4\text{S}_2\text{O}_5$           | 113.78                          | 114.73                          | 111.58                      | 118.22        |
| $\text{O}_1\text{HO}_5$                    | 146.22                          |                                 |                             |               |
| $\text{HS}_1\text{S}_2$                    |                                 | 84.45                           |                             |               |
| $\text{O}_1\text{S}_1\text{S}_2$           | 94.17                           | 87.44                           | 111.58                      |               |
| $\text{O}_2\text{S}_1\text{S}_2$           | 109.45                          | 148.72                          | 104.08                      |               |
| $\text{O}_3\text{S}_1\text{S}_2$           | 121.68                          | 37.37                           | 104.08                      |               |
| $\text{S}_1\text{S}_2\text{O}_4$           | 105.80                          | 120.99                          | 104.52                      |               |
| $\text{S}_1\text{S}_2\text{O}_5$           | 91.97                           | 88.06                           | 104.51                      |               |
| $\text{HO}_1\text{S}_1\text{O}_2$          | -99.02                          |                                 |                             |               |
| $\text{HO}_1\text{S}_1\text{O}_3$          | 137.17                          |                                 |                             |               |
| $\text{HO}_1\text{S}_1\text{S}_2$          | 12.78                           |                                 |                             |               |
| $\text{O}_1\text{S}_1\text{S}_2\text{O}_4$ | 100.66                          | -137.42                         | 58.68                       |               |
| $\text{O}_2\text{S}_1\text{S}_2\text{O}_4$ | -149.68                         | 5.39                            |                             |               |
| $\text{O}_3\text{S}_1\text{S}_2\text{O}_4$ | -9.87                           | -2.52                           |                             |               |
| $\text{O}_1\text{S}_1\text{S}_2\text{O}_5$ | -14.75                          | 104.67                          | -58.68                      |               |



|                |         |         |
|----------------|---------|---------|
| $O_2S_1S_2O_5$ | -125.27 | -112.51 |
| $O_3S_1S_2O_5$ | 94.91   | -120.42 |
| $HS_1S_2O_4$   |         | 116.88  |
| $HS_1S_2O_5$   |         | -1.03   |

---

Figure S1. Characterization of  $[P_{4448}][HCO_3^-]$ . (a)  $^1H$  NMR spectrum at 25 °C (no solvent), (b)  $^{13}C$  NMR spectrum at 23 °C (no solvent), (c) ATR-IR spectra (measured by JASCO FT/IR-4200) at 23 °C (no solvent) and mass spectrum measured by SHIMADZU LCMS-2020 on (d) positive and (e) negative mode.

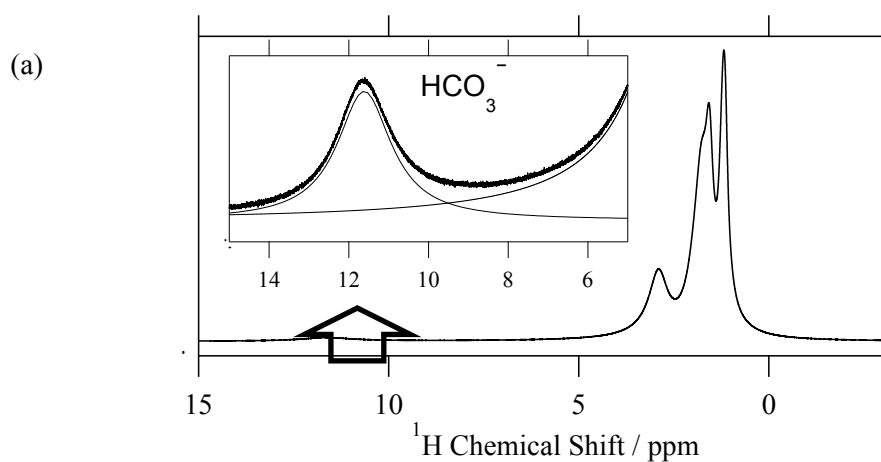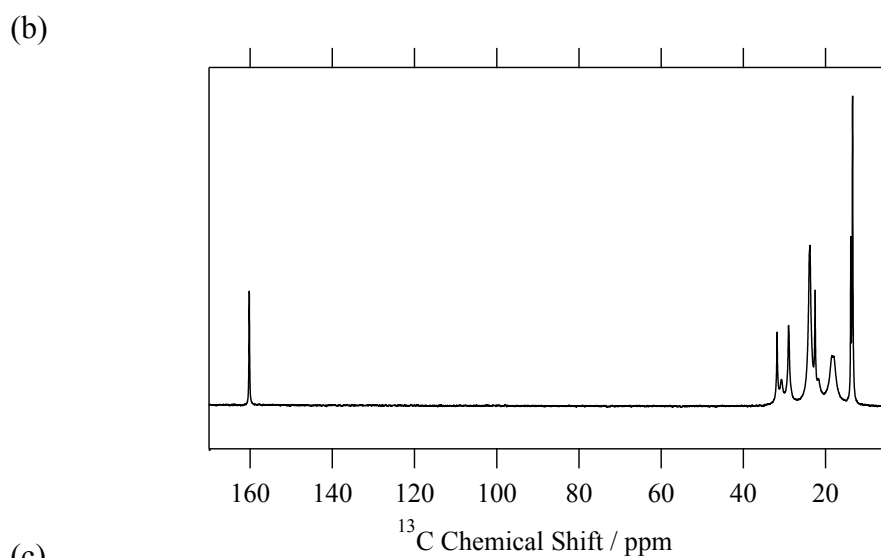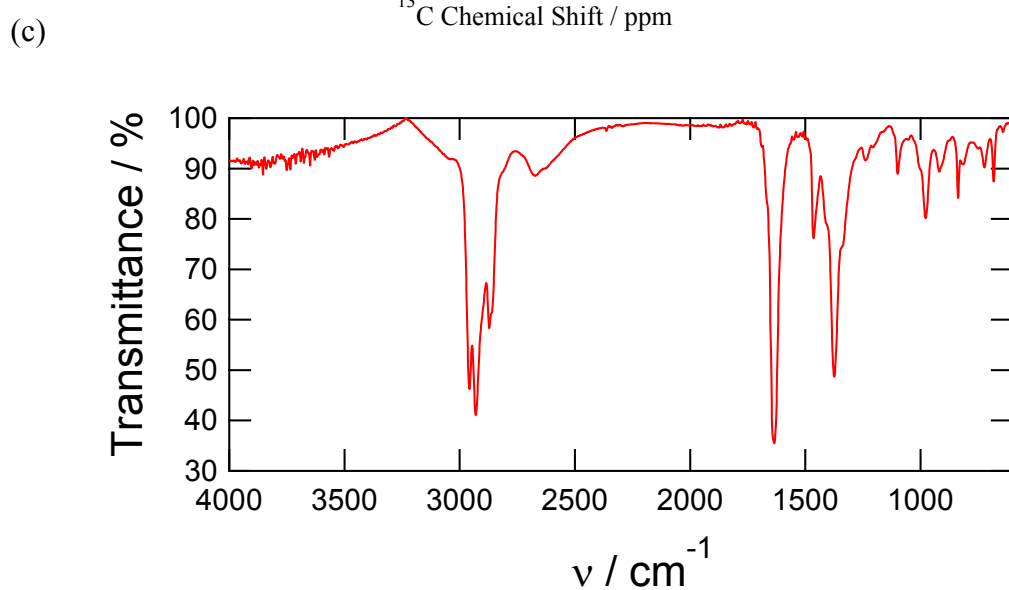

Peak ( $cm^{-1}$ ); 640(vw), 683(w), 721(w), 753(vw), 814(w), 837(m), 920(w), 976(m), 1006(shoulder), 1097(w), 1236(vw), 1333(shoulder), 1374(s), 1413(shoulder), 1465(m), 1635(vs), 2678(broad), 2857(shoulder), 2871(s), 2930(s), 2957(s)

(d)

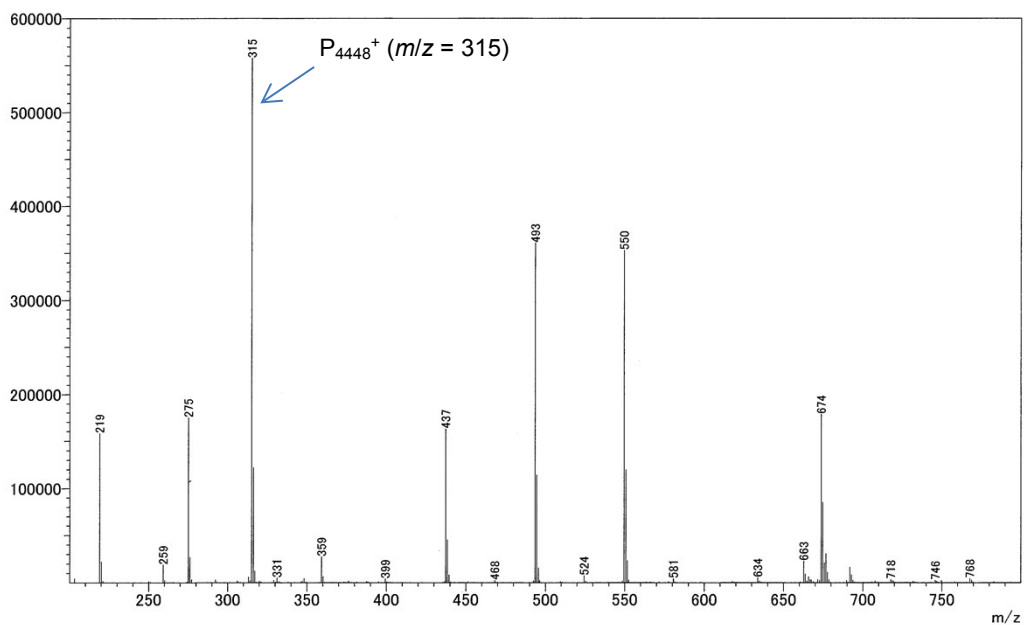

(e)

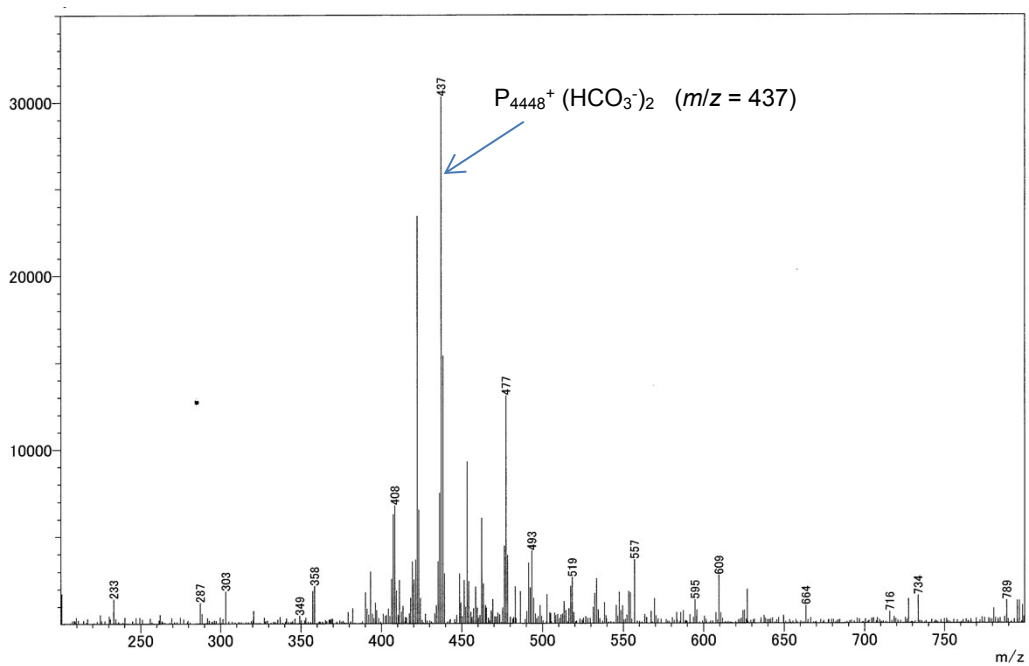

Figure S2  $^{13}\text{C}$  NMR spectra of  $\text{SO}_2$ -loaded ionic liquid (left: bicarbonate, right:  $\text{P}_{4448}$  cation). The spectra were collected at 25 °C except for  $q_{\text{SO}_2} = 0$  (23 °C). The cation peaks sharpen at increased  $\text{SO}_2$  loadings because of the decrease in viscosity. The chemical shift reference was taken by the terminal methyl carbons of the  $\text{P}_{4448}$  cation.

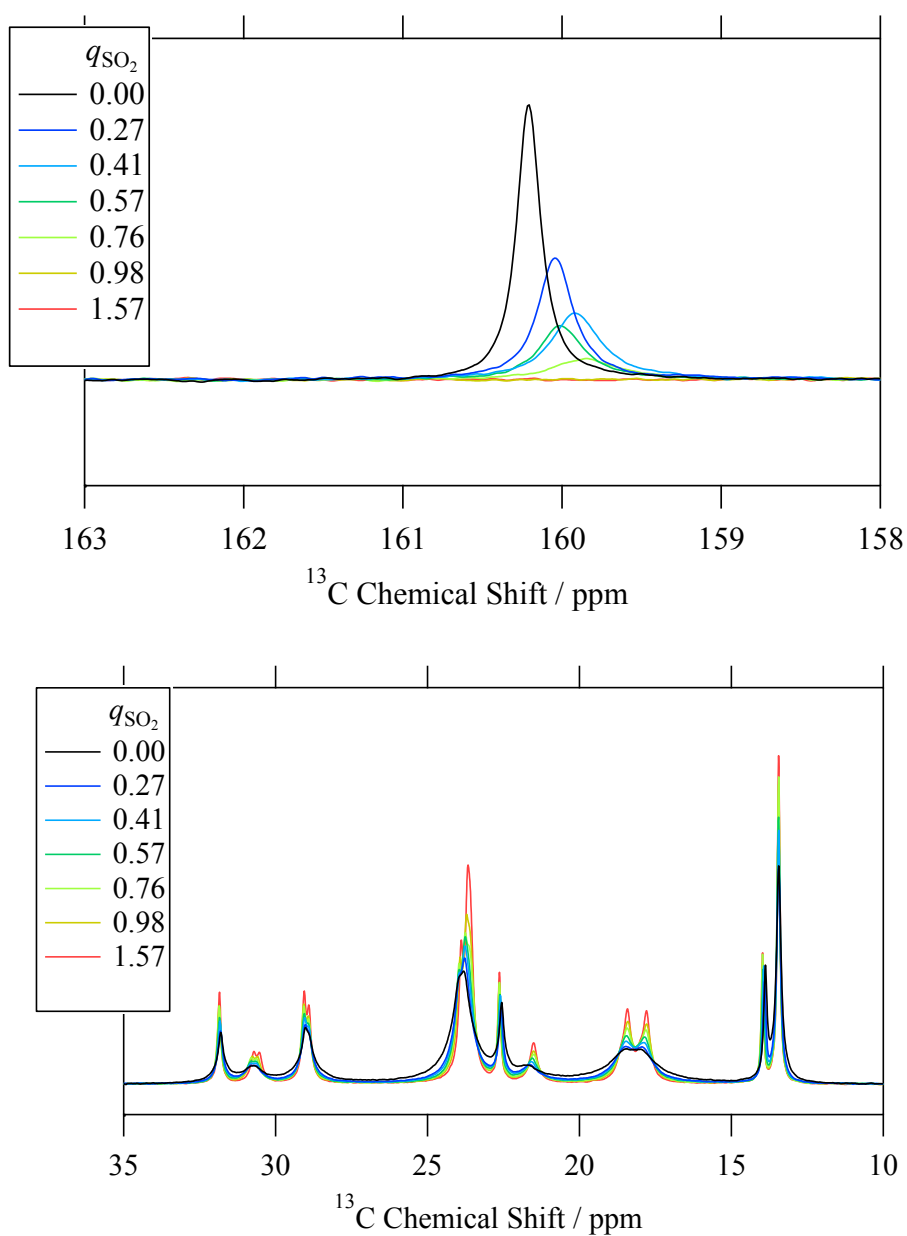

Figure S3.  $^1\text{H}$  NMR spectra at 298-338 K. The peak at 10 ppm assigned to the  $\text{HSO}_3^-$  isomer broadens at higher temperature due to the increase in the isomer exchange rate. The peak assigned to the hydroxyl protons ( $\text{HOSO}_2^-$ ,  $\text{HCO}_3^-$ ) shifts from 7.7 to 6.6 ppm as the temperature is raised

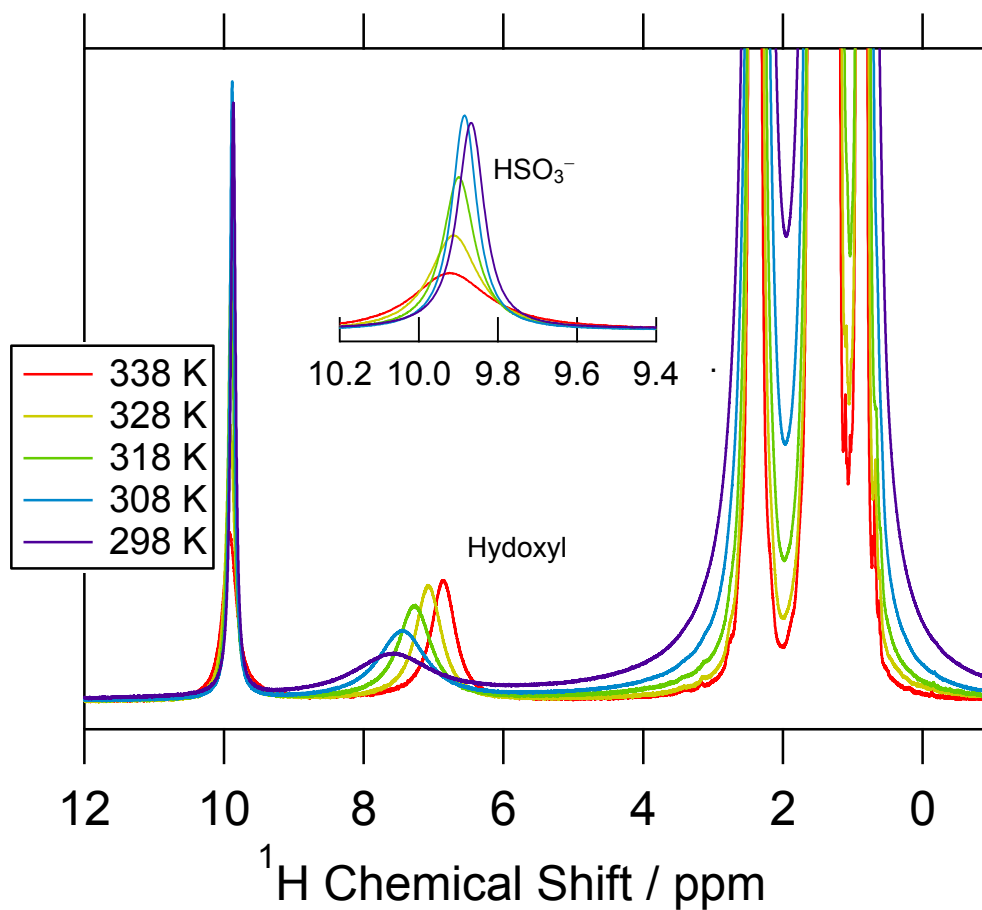

Figure S4. Images of the optimized structure of (a)  $\text{HCO}_3^-$ , (b)  $\text{HSO}_3^-$ , and (c)  $\text{HOSO}_2^-$  by the DFT calculations using B3PW91 functional and aug-cc-pVTZ basis set.

(a)

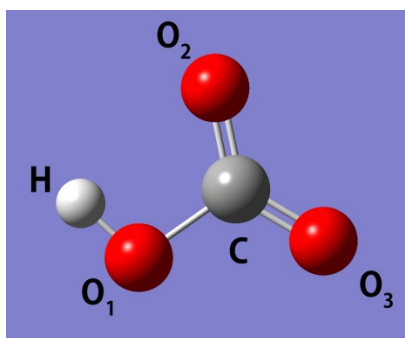

(b)

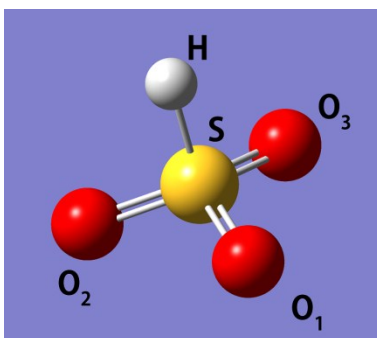

(c)

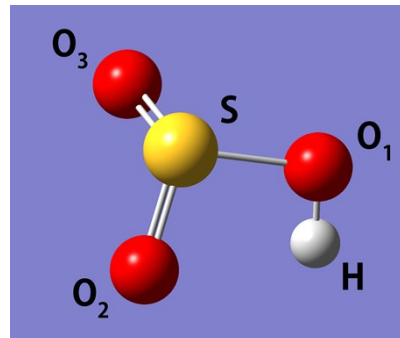

Figure S5. Images of the optimized structures of (a) all trans conformations and (b) all gauche conformations of alkyl-chains of cation ( $[P_{4448}]^+$ ), together with the clusters of all trans  $[P_{4448}]^+$  with (c)  $HCO_3^-$ , (d)  $HSO_3^-$ , and (e)  $HOSO_2^-$ , by the DFT calculations using B3PW91 functional and 6-311G+(d,p) basis set.

(a)

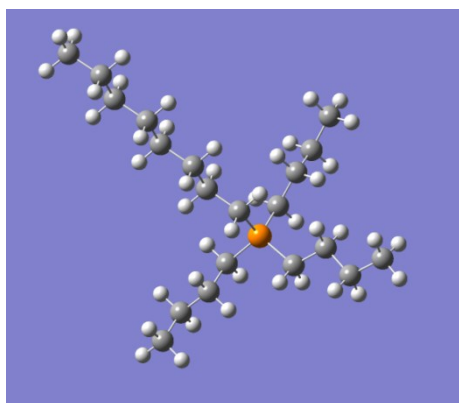

(b)

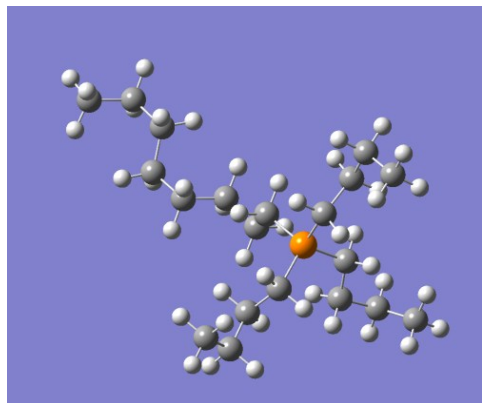

(c)

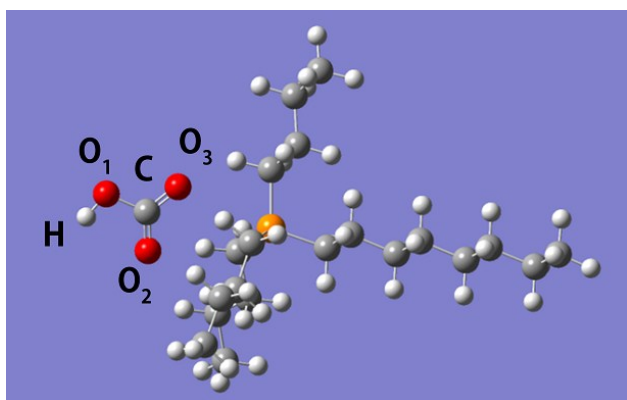

(d)

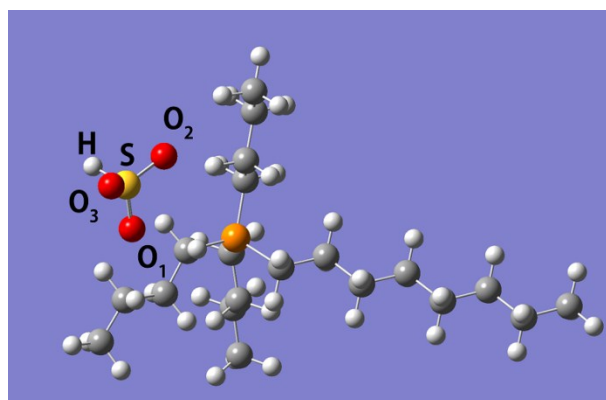

(e)

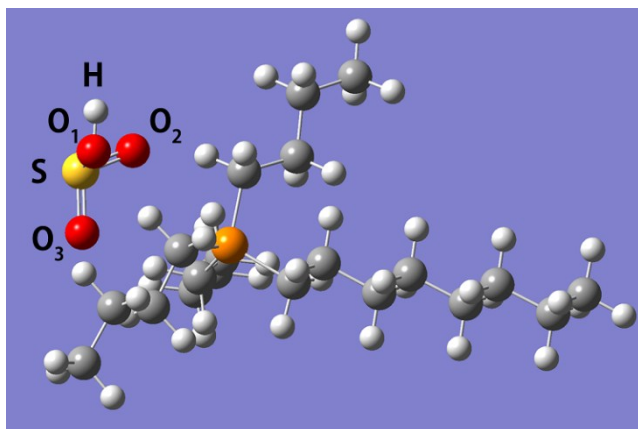

Figure S6. Comparison between the theoretical and experimental Raman spectra of  $[P_{4448}]^+$ .

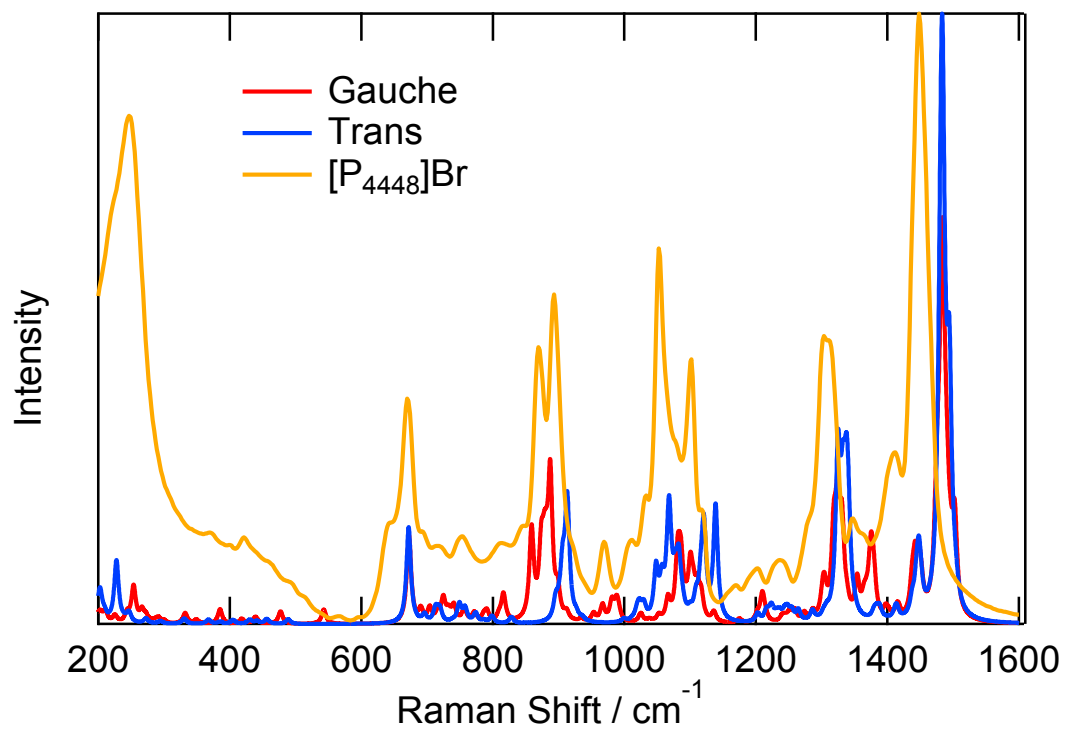



Figure S7. (a) Typical example of the multi-peak fitting in the finger-print region. (b) Vibrational frequencies of the SH stretching with different  $q_{SO_2}$ . In doing the multi-peak fit of the spectrum, we have used the macro function incorporated into the Igor 6.22 A (Wavemetric). The difference spectra of the finger-print region were further divided into several regions in order to making the multi-peak fit without using any complex baseline function. Most complex part was the region from 1020  $cm^{-1}$  to 1180  $cm^{-1}$  where several bands overlaps. We have assumed that five different bands with different shapes contribute the spectrum for the spectra with  $q_{SO_2} \leq 1$ . The band shape functions were chosen to fit the spectrum (Gaussian (band I, 1029  $cm^{-1}$ ), exponentially modified Gaussian (ExpModGauss) (band II, 1048  $cm^{-1}$ ), Voigt (band III, 1079  $cm^{-1}$ ), Gaussian (band IV, 1099  $cm^{-1}$ ), and Voigt (band V, 1119  $cm^{-1}$ ). The band IV at 1099  $cm^{-1}$  is very weak and made minor contribution to the total spectrum, but it was necessary to fit the whole spectrum reasonably. Since the band shape at 1048  $cm^{-1}$  is asymmetric, the ExpModGauss function was employed to fit the band. The Gaussian width parameters for band I and band IV, the Gaussian width and the exponential component of a ExpModGauss function for band II, and the width and shape (mixing ratio of Gaussian and Lorentzian) parameters of a Voigt function (band III and V) were fixed to optimized values for each band through the fitting all spectra with different values of  $q_{SO_2}$ . In the fitting of the SH stretching mode, an ExpModGauss function was employed to represent the asymmetric nature of the band.

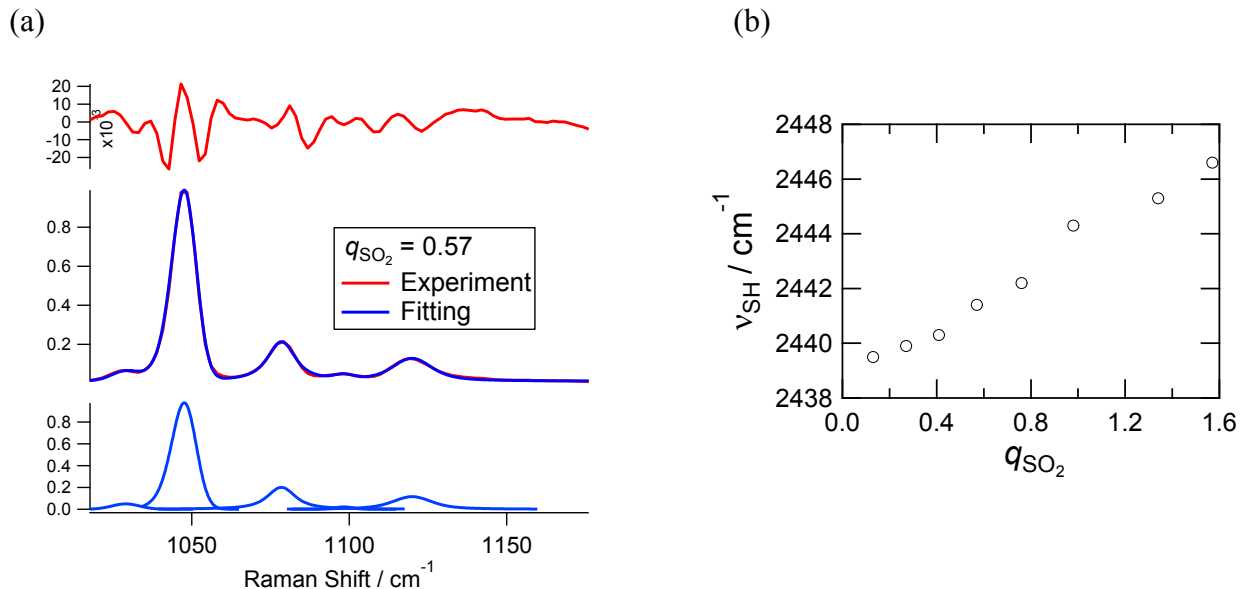

Figure S8. Vibrational spectra (Raman activities) of different anions with  $[P_{4448}]^+$  and without  $[P_{4448}]^+$ . The vibrational modes that mainly derive from the anion species are selected and depicted. The upper panel shows the difference of the normalized Raman spectra of  $[P_{4448}]\text{HCO}_3$  with different  $q_{\text{SO}_2}$  from that of neat  $[P_{4448}]\text{HCO}_3$ .

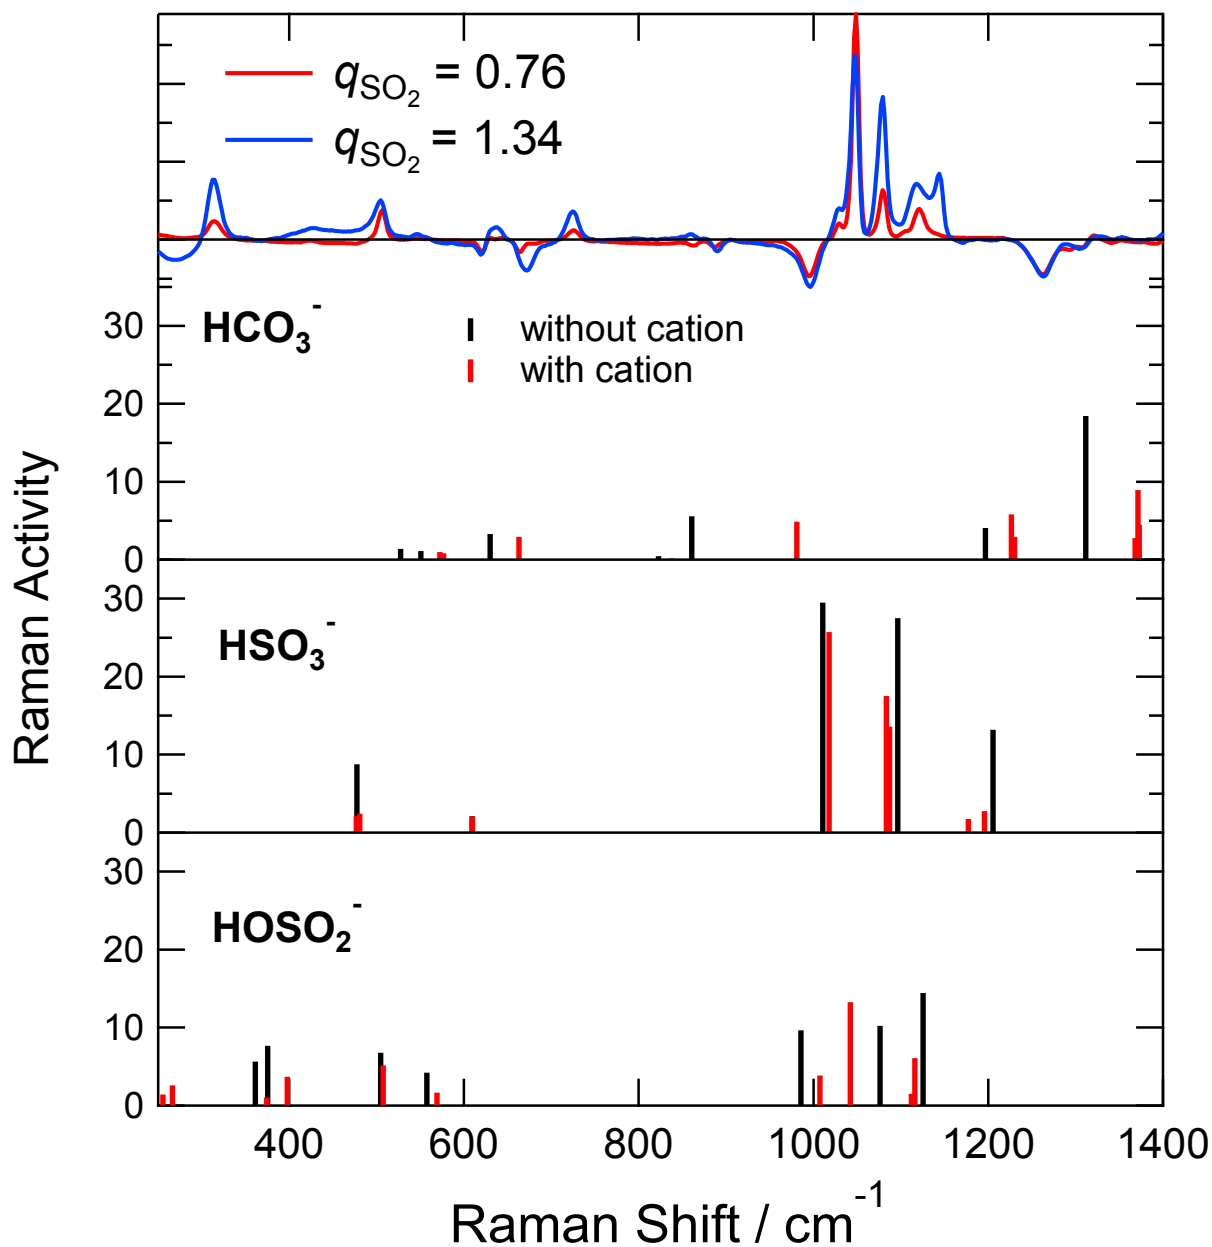

Figure S9. Optimized structures of the dimers of  $\text{HOSO}_2^-$  (symmetric (a) and asymmetric (b) )and (c) vibrational spectra (Raman activities) of different anions calculated by DFT with B3PW91 functional and aug-cc-pVTZ basis set in SCRF water. The upper panel shows the difference of the normalized

Raman spectra of  $[\text{P}_{4448}]\text{HCO}_3$  with different  $q_{\text{SO}_2}$  from that of neat  $[\text{P}_{4448}]\text{HCO}_3$ .

(a)

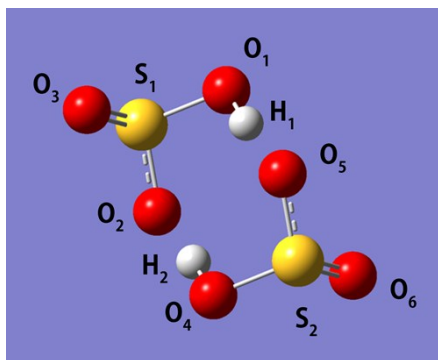

(b)

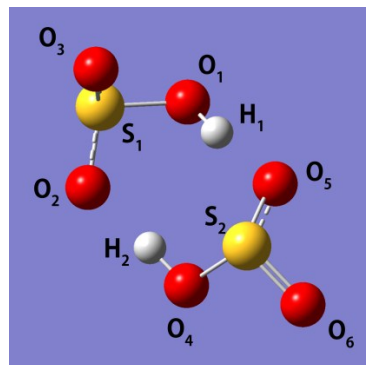

(c).

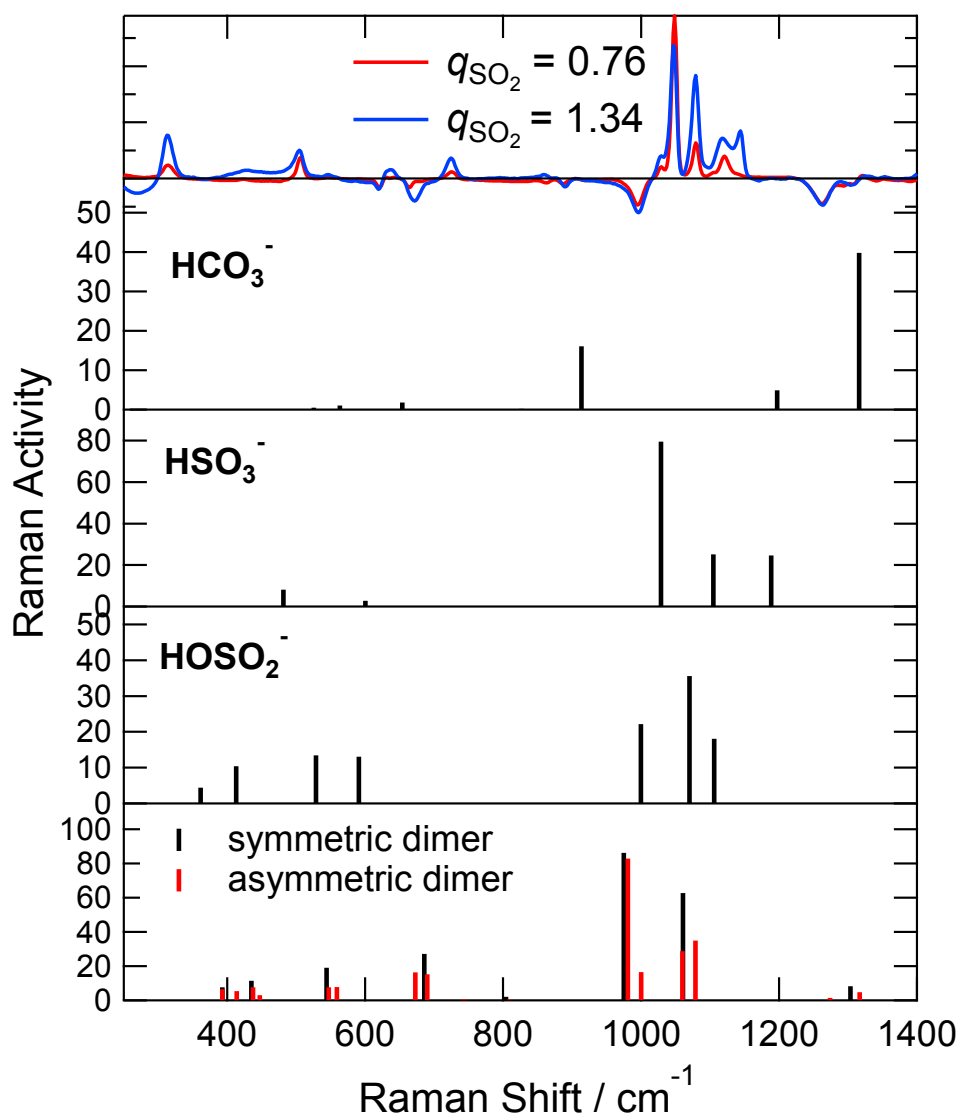

Figure S10. Optimized structures of (a) the complex of  $\text{HOSO}_2^-$  and  $\text{SO}_2$ , (b) the complex of  $\text{HSO}_3^-$  and  $\text{SO}_2$ , (c)  $\text{S}_2\text{O}_5^{2-}$  and (d)  $\text{SO}_2$ , and (e) vibrational spectra (Raman activities) of  $\text{HSO}_3^-$ ,  $\text{HOSO}_2^-$ , the complex of  $\text{HOSO}_2^-$  and  $\text{SO}_2$ , the complex of  $\text{HSO}_3^-$  and  $\text{SO}_2$ ,  $\text{S}_2\text{O}_5^{2-}$ , and  $\text{SO}_2$  by DFT with B3PW91 functional and aug-cc-pVTZ basis set.

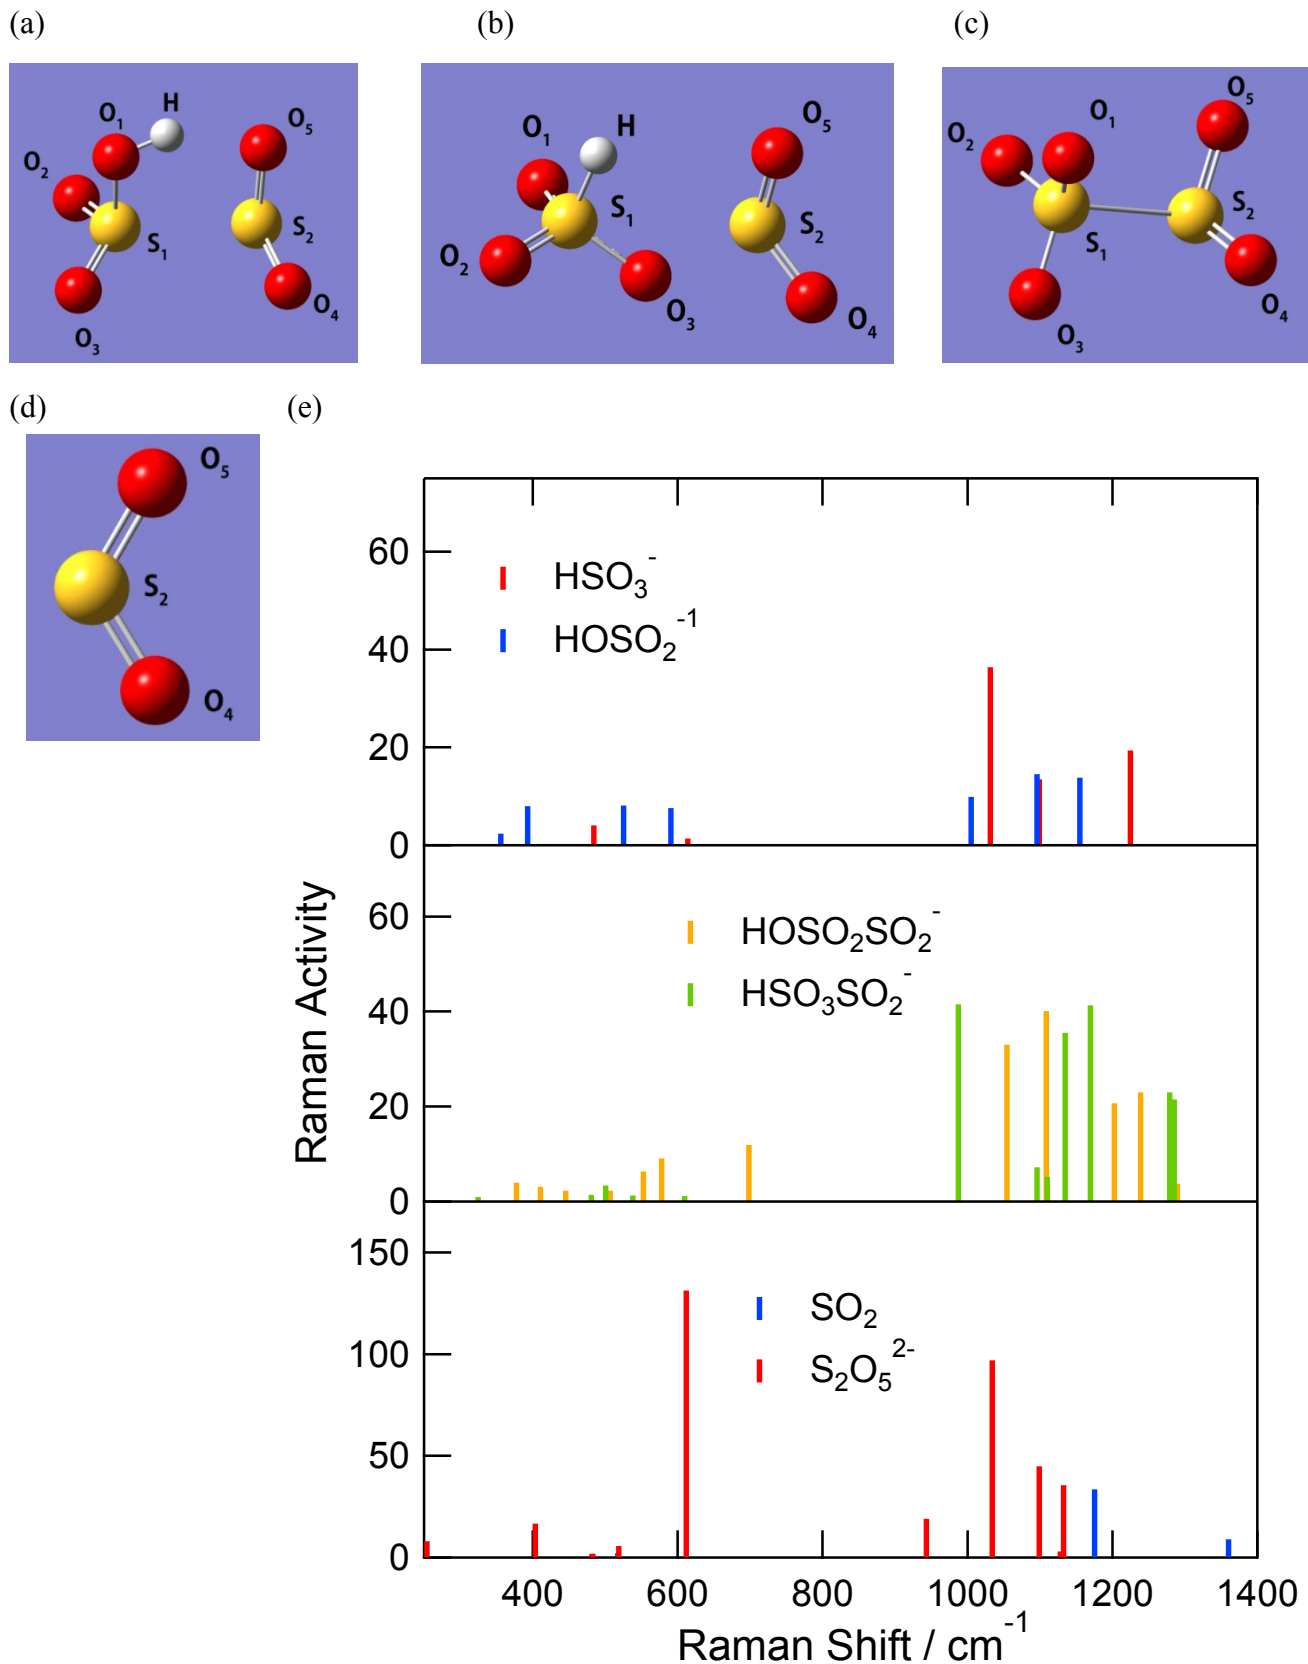

Supplement: c6ra25528k1.pdf [file c6ra25528k1.pdf]
